# Supplementary material for: Willpower and Conscious Percept: Volitional Switching in Binocular Rivalry
Source: PubMed Central journal article supplement (PMC3338481; doi:10.1371/journal.pone.0035963), 2012-04-25
Supplement: pone.0035963.s004.pdf [file pone.0035963.s004.pdf]

|    | Match between OKN pursuit and grating direction |       | Dominance Durations for Passive Rivalry (s) |      |      | Key press volition measure |      |      | OKN volition measure |      |
|----|-------------------------------------------------|-------|---------------------------------------------|------|------|----------------------------|------|------|----------------------|------|
| ID | Left                                            | Right | AM                                          | DM   | ST   | AM                         | DM   | ST   | AM                   | DM   |
| LH | 0.73                                            | 0.89  | 2932                                        | 4550 | 1467 | 0.98                       | 0.96 | 0.98 | 0.96                 | 0.94 |
| AP | 0.73                                            | 0.40  | 1860                                        | 1855 | 2374 | 0.96                       | 0.86 | 0.57 | 0.66                 | 0.30 |
| RS | 0.77                                            | 0.89  | 3039                                        | 1389 | 1389 | 0.63                       | 0.46 | 0.33 | 0.67                 | 0.53 |
| ML | 0.75                                            | 0.50  | 1932                                        | 2858 | 2187 | 0.53                       | 0.41 | 0.04 | 0.45                 | 0.34 |
| NH | 0.28                                            | 0.49  | 1435                                        | 2058 | 2990 | 0.54                       | 0.68 | 0.01 | 0.41                 | 0.43 |
| BT | 0.24                                            | 0.67  | 1639                                        | 2320 | 1686 | 0.18                       | 0.09 | 0.05 | 0.04                 | 0.08 |
